# Supplementary material for: A Web-Based Toolkit to Provide Evidence-Based Resources About Crystal Methamphetamine for the Australian Community: Collaborative Development of Cracks in the Ice
Source: PubMed Central journal article supplement (PMC5883077; doi:10.2196/mental.8891), 2018-03-20
Supplement: mental_v5i1e21_app2.pdf [file mental_v5i1e21_app2.pdf]

Multimedia Appendix 2: Example feedback from end-users and the Expert Advisory Group about the beta-version of Cracks in the Ice.

---

| Source    | Example feedback                                                                                                                                    |
|-----------|-----------------------------------------------------------------------------------------------------------------------------------------------------|
| Community | <i>"It's informative and interactive and easy to find information."</i>                                                                             |
| Community | <i>"It's easy to navigate for people who could be distressed and rushing to help a friend or family member."</i>                                    |
| Community | <i>"I like the images as they are relevant and portray that the website is for anyone to use. I also like that they aren't stereotypical."</i>      |
| Community | <i>"I like 'Starting the Conversation' as this is one of the hardest parts of dealing with an ice user. It is well set out and understandable."</i> |
| Community | <i>"The variety of different sources people can access for help is great."</i>                                                                      |
| Expert    | <i>"It is very static. Perhaps as part of future development we could add some movement eg, rotating images."</i>                                   |
| Expert    | <i>"Friendly, inclusive, simple to navigate."</i>                                                                                                   |
| Expert    | <i>"I think a glossary of unfamiliar terms would be useful."</i>                                                                                    |

---
